# Supplementary material for: Usp9X Regulates Cell Death in Malignant Peripheral Nerve Sheath Tumors
Source: PubMed Central journal article supplement (PMC6255814; doi:10.1038/s41598-018-35806-5), 2018-11-26
Supplement: 41598_2018_35806_MOESM1_ESM.pdf [file 41598_2018_35806_MOESM1_ESM.pdf]

Usp9X Regulates Cell Death in Malignant Peripheral Nerve Sheath Tumors.

Bianchetti E, Bates SJ, Carroll SL, Siegelin MD, Roth KA

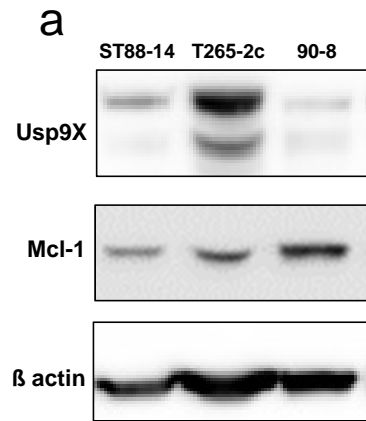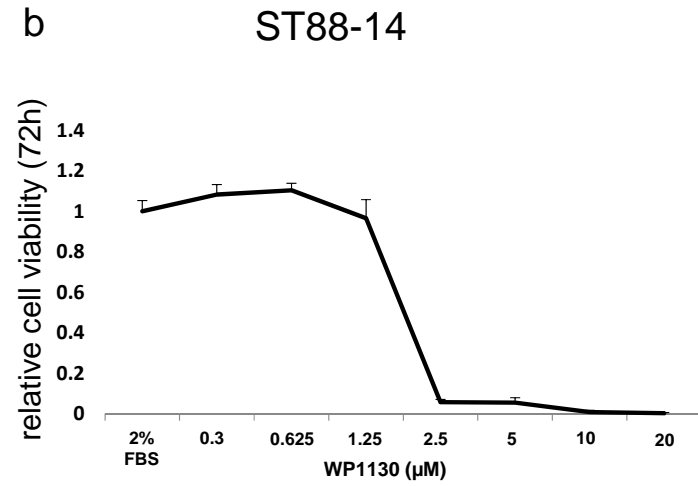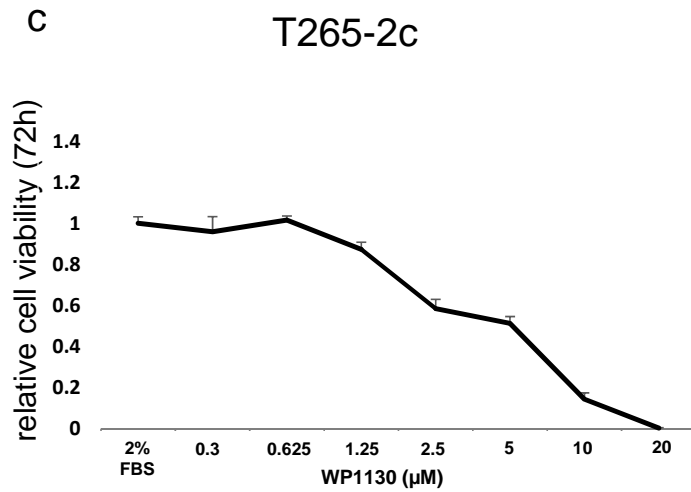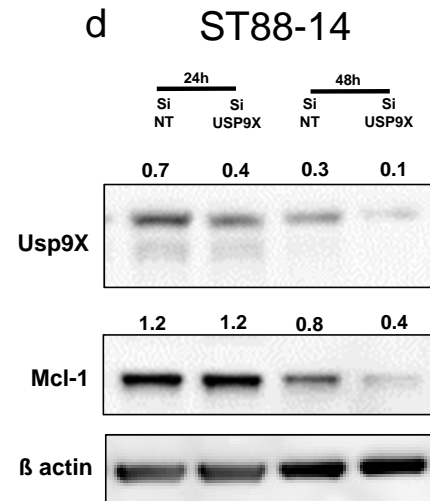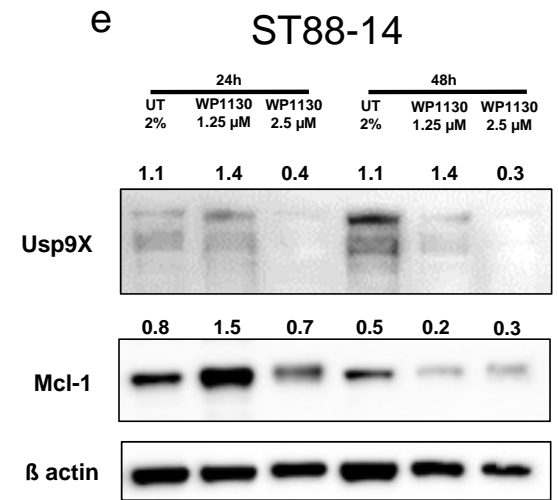

**Supplementary Fig. 1: Usp9X expression and pharmacological inhibition in human NF1 patient-derived MPNST cell lines. Usp9X inhibition causes Mcl-1 depletion in MPNST cell lines.** (a) A panel of human MPNST cell lines was analyzed for the expression of Usp9X and Mcl-1 by Western blotting. (b, c) ST88-14 (b), T265-2c (c) cells were treated with increasing concentrations of WP1130 for 72h. Cellular viability was determined by CellTiter-Glo<sup>®</sup> assay and the relative cell viability values were calculated normalizing data to untreated samples. Data are presented as mean and SD, n=1. (d, e) ST88-14 cells were transfected for 24 h and 48 h with either non-targeting (NT)-siRNA or Usp9X-siRNA (d) or treated with WP1130 at the concentration of 1.25 and 2.5  $\mu$ M for 24 h and 48 h (e). Whole cell extracts were collected prior to Western blot analysis for Usp9X, Mcl-1 and  $\beta$ -actin (loading control). Numbers shows protein quantification analyzed through ImageJ. N=3.

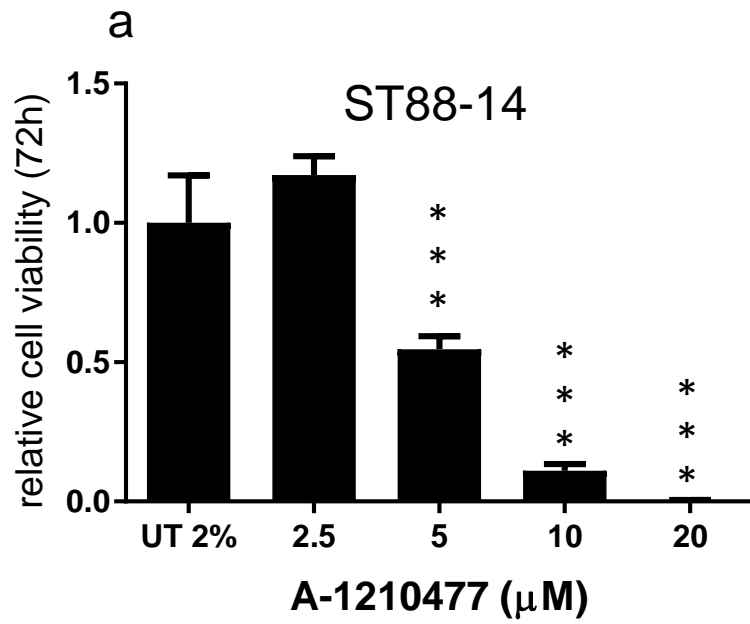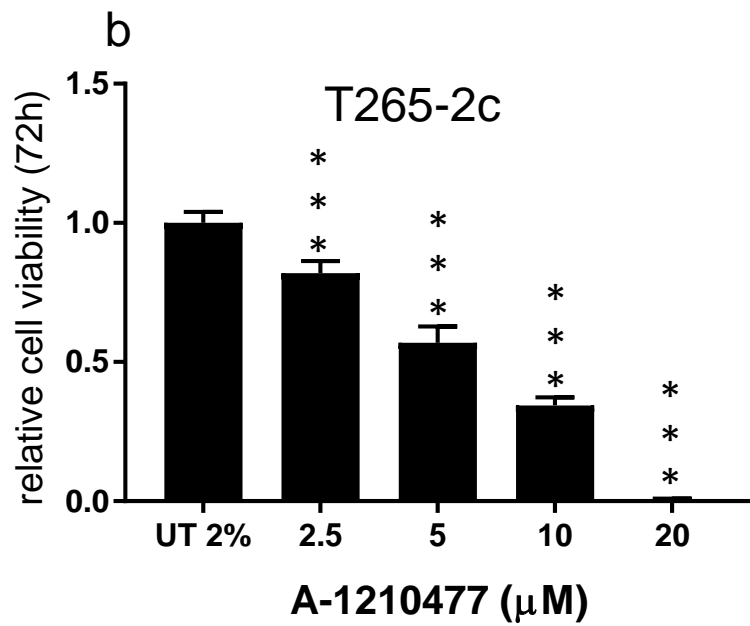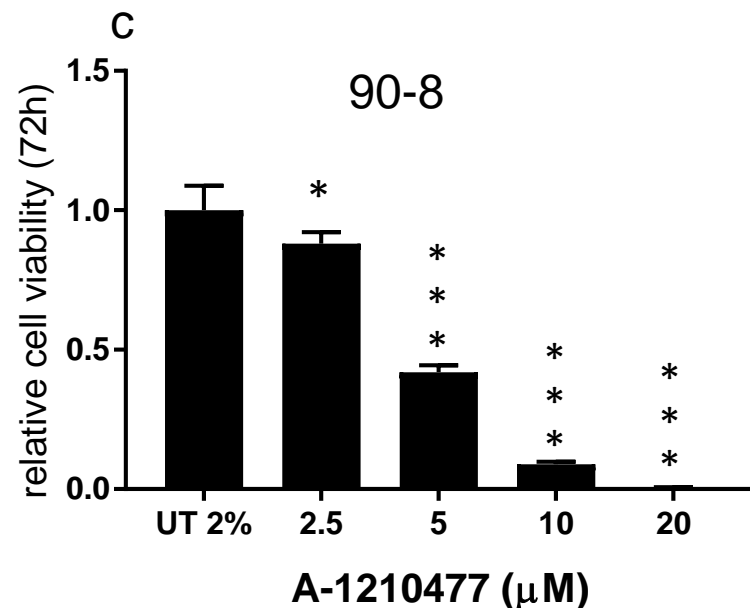

**Supplementary Fig. 2: Mcl-1 pharmacological inhibition using A-1210477 reduces cell viability in MPNST cell lines.** (a-c) ST88-14 cells (a), T265-2c cells (b) and 90-8 cells (c) were treated with increasing concentrations of A-1210477 for 72h. Cellular viability was determined by CellTiter-Glo<sup>®</sup> assay and the relative cell viability values were calculated normalizing data on the untreated samples. \* = 0.0135, \*\*\* ≤ 0.001. Data are presented as mean and SD, n=3.

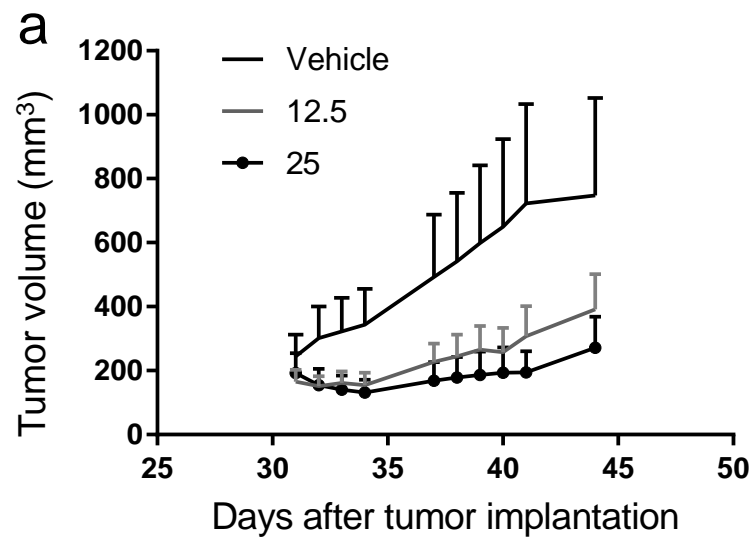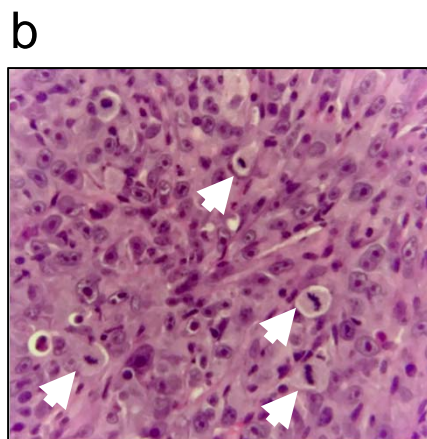

Vehicle

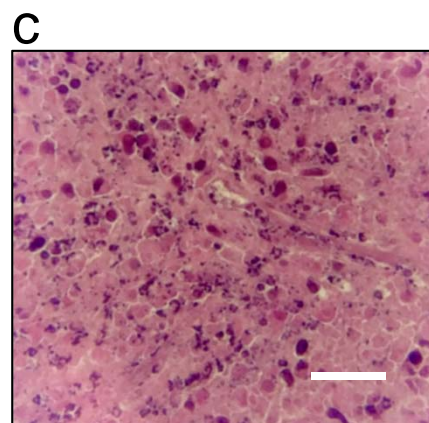

WP1130

**Supplementary Fig. 3: Delayed treatment with WP1130 reduces tumor size in a mouse model generated by subcutaneous injection of ST88-14 cell line.** (a) Tumor growth curves showing the increase in tumor size for each treatment group. Data are presented as mean and SEM. One-way ANOVA test for multiple comparisons showed a statistically significant difference between groups, with  $p \leq 0.001$ . (b, c) Representative pictures, after H & E staining, showing the histological morphology of tumors from animals receiving either vehicle or WP1130 at the concentration of 12.5 mg/Kg. Mitotic figures are highlighted by arrows. Scale bar, 50  $\mu\text{m}$ .

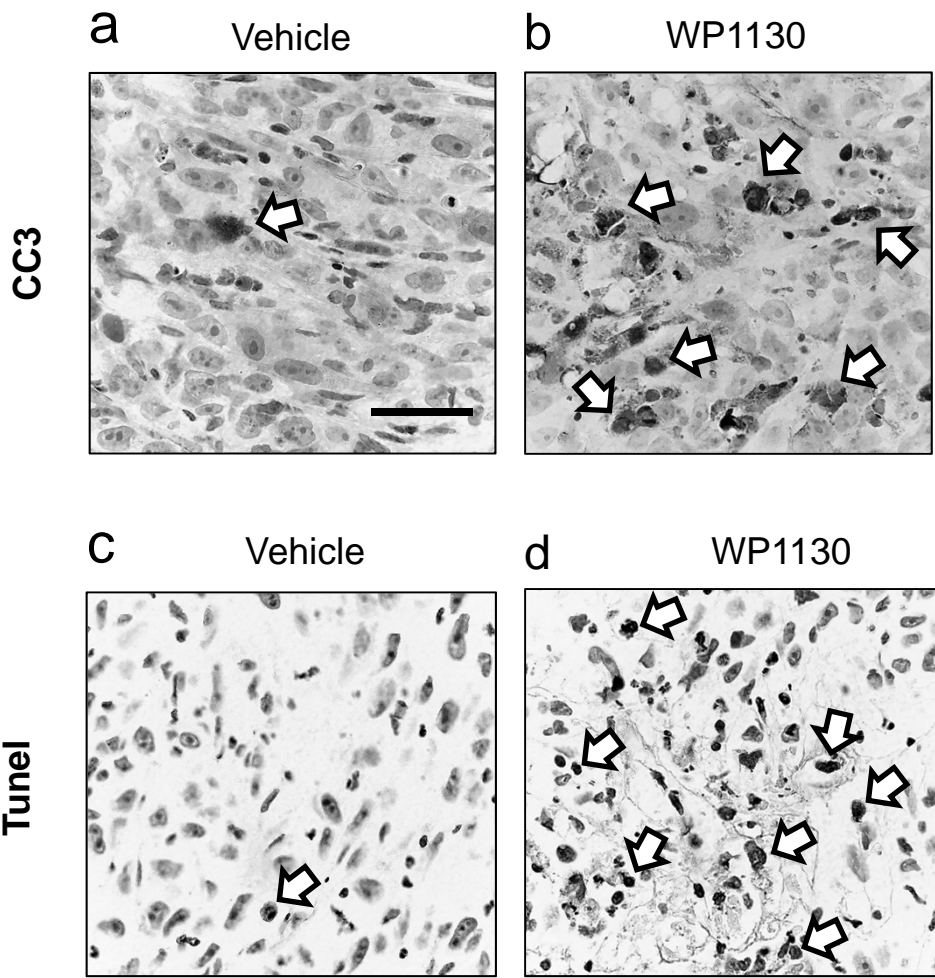



**Supplementary Fig. 4: WP1130 treatment *in vivo* increases cleaved caspase 3**

**immunoreactivity and TUNEL staining in MPNSTs. (a, b)** Representative photomicrographs showing cleaved caspase 3 immunoreactivity (CC3) of tumors from mice receiving either vehicle or WP1130 at the concentration of 25 mg/kg. Arrows indicate positive cells. Scale bar, 60  $\mu$ m.

**(c, d)** Representative photomicrographs showing TUNEL staining of tumors from mice receiving either vehicle or WP1130 at the concentration of 12.5 mg/Kg. Arrows indicate positive cells. Scale bar, 60  $\mu$ m.
