# Supplementary material for: Usp9X Regulates Cell Death in Malignant Peripheral Nerve Sheath Tumors
Source: PubMed Central journal article supplement (PMC6255814; doi:10.1038/s41598-018-35806-5), 2018-11-26

Usp9X Regulates Cell Death in Malignant Peripheral Nerve Sheath Tumors.

Bianchetti E, Bates SJ, Carroll SL, Siegelin MD, Roth KA

Fig. 1 g

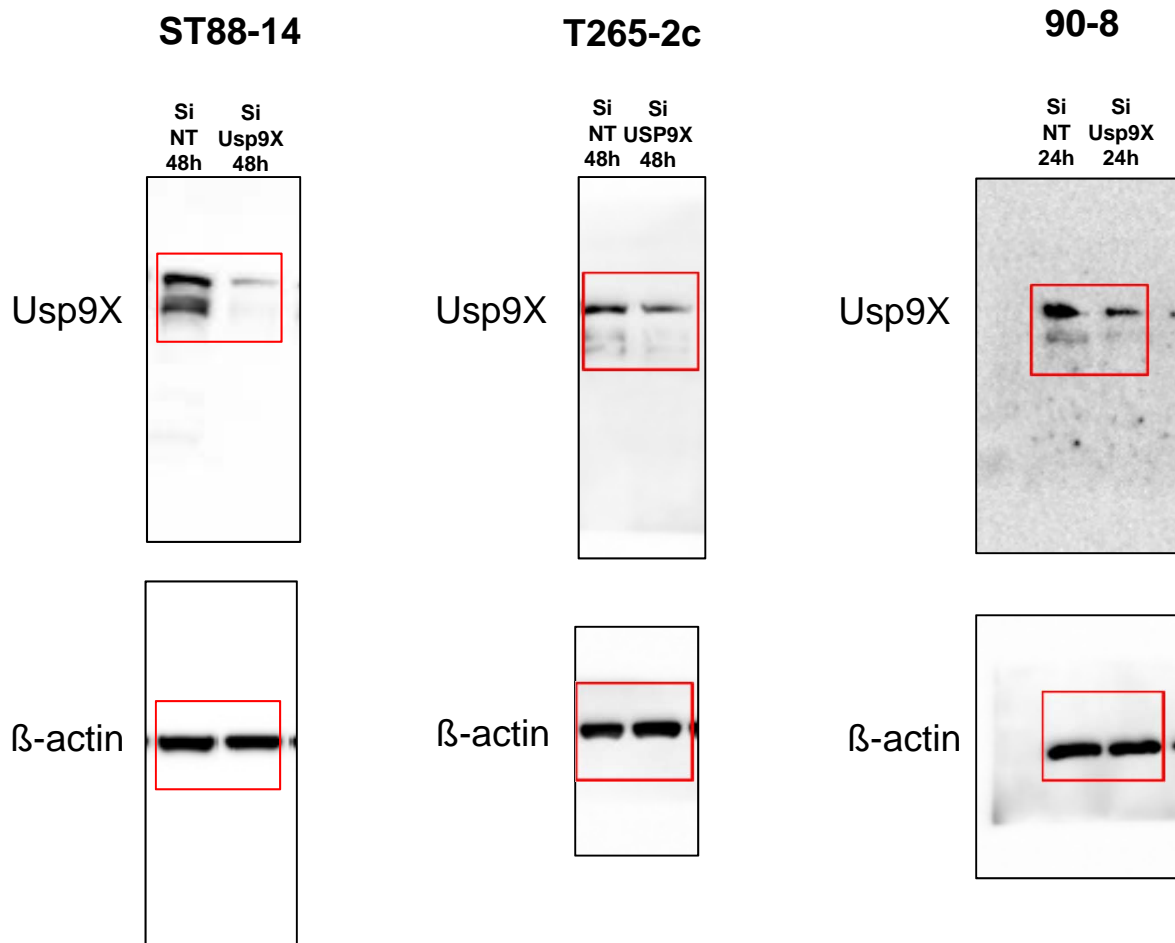

Fig. 3 h

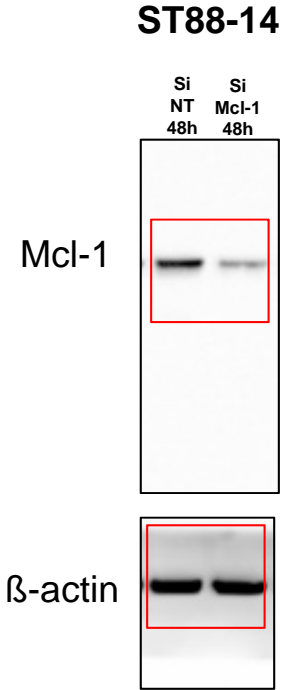

Fig. 3 i

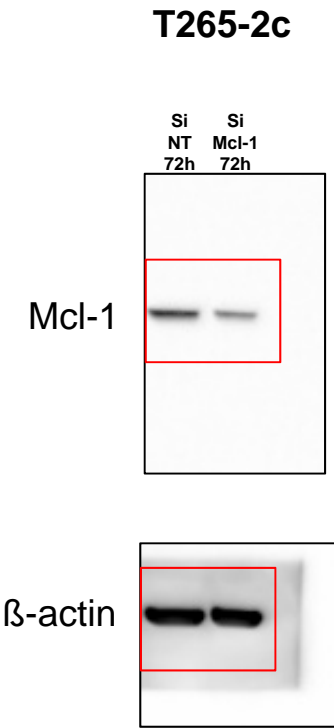

Fig. 5 a

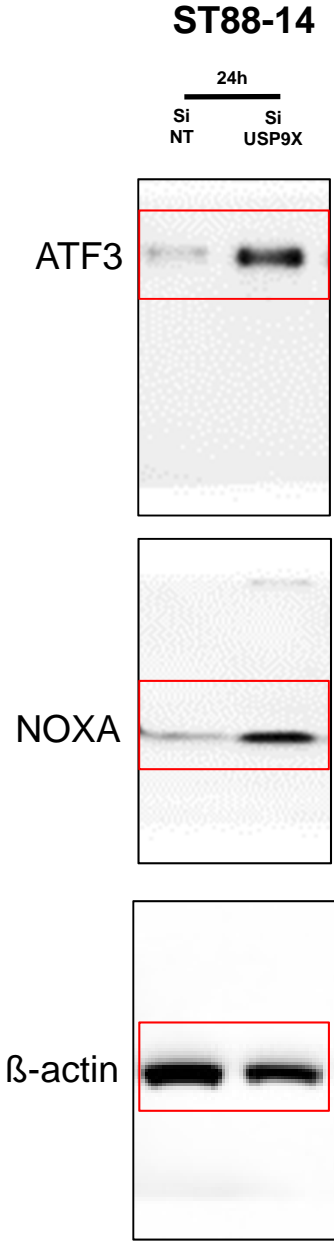

Fig. 5 b

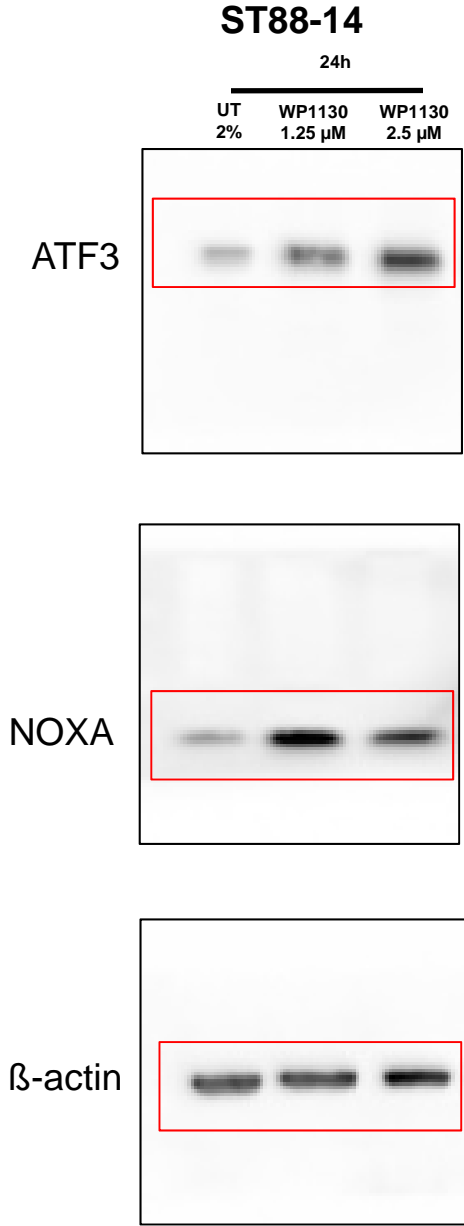

Fig. 6 g

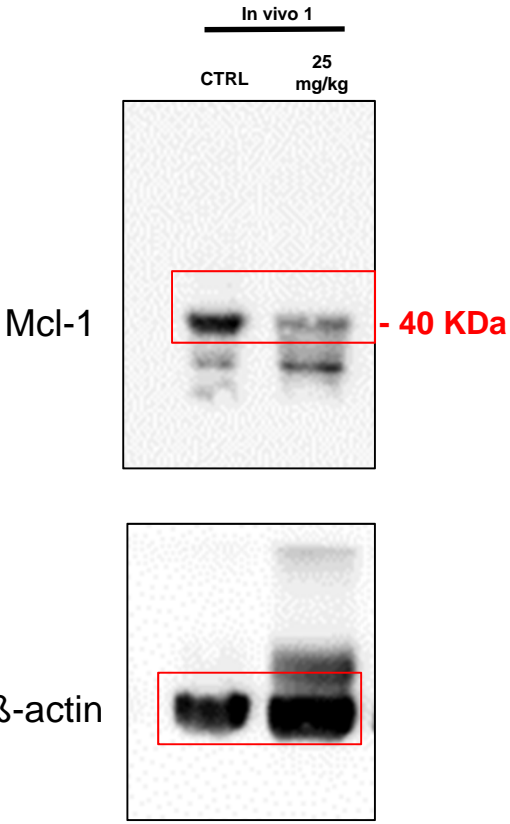

Suppl. Fig. 1 a

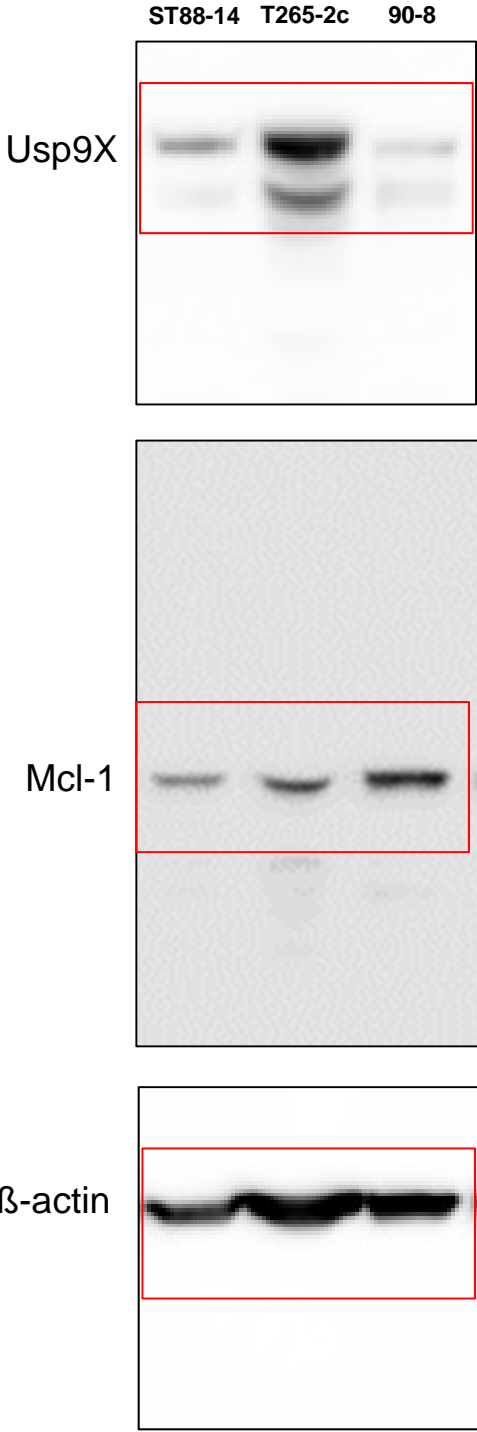

Suppl. Fig. 1 d

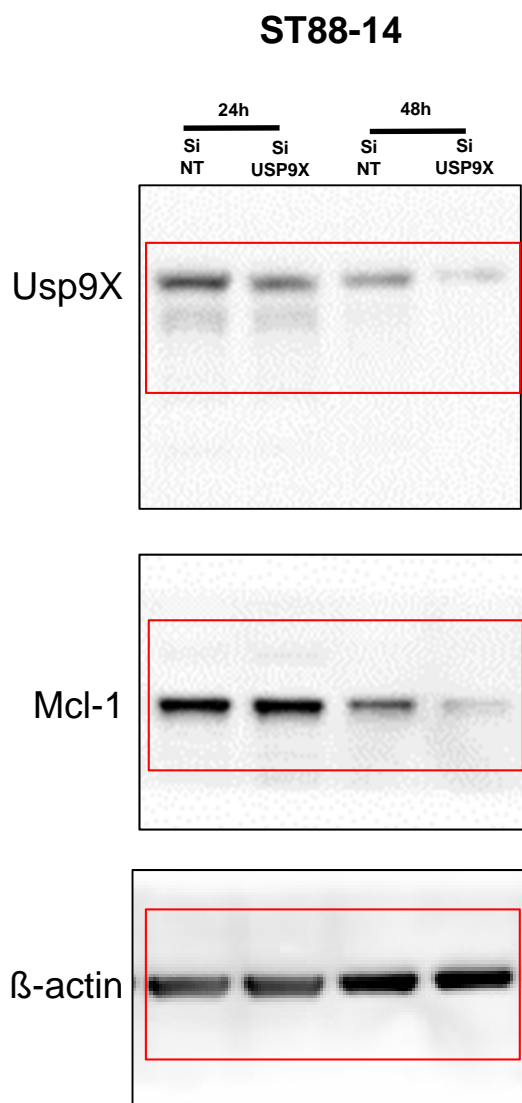

Suppl. Fig. 1 e

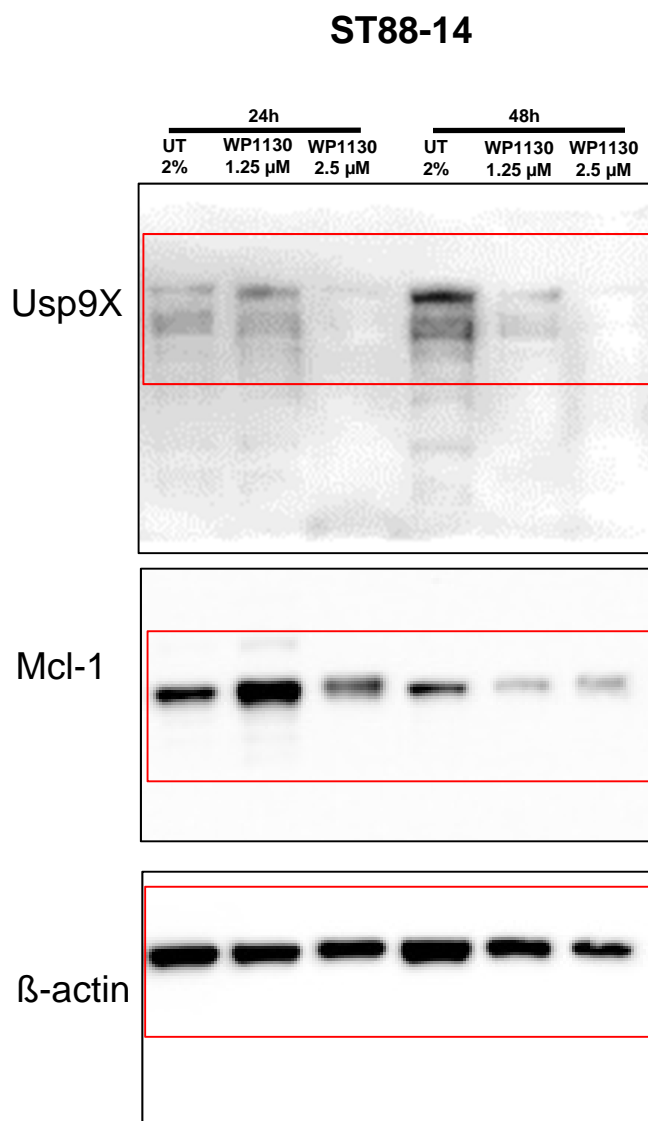

Supplement: 41598_2018_35806_MOESM2_ESM.pdf [file 41598_2018_35806_MOESM2_ESM.pdf]
